# Supplementary material for: Resistance of SARS-CoV-2 variants to neutralization by convalescent plasma from early COVID-19 outbreak in Singapore
Source: PubMed Central journal article supplement (PMC8546091; doi:10.1038/s41541-021-00389-2), 2021-10-25
Supplement: 41541_2021_389_MOESM1_ESM.pdf [file 41541_2021_389_MOESM1_ESM.pdf]

## SUPPLEMENTARY FIGURES

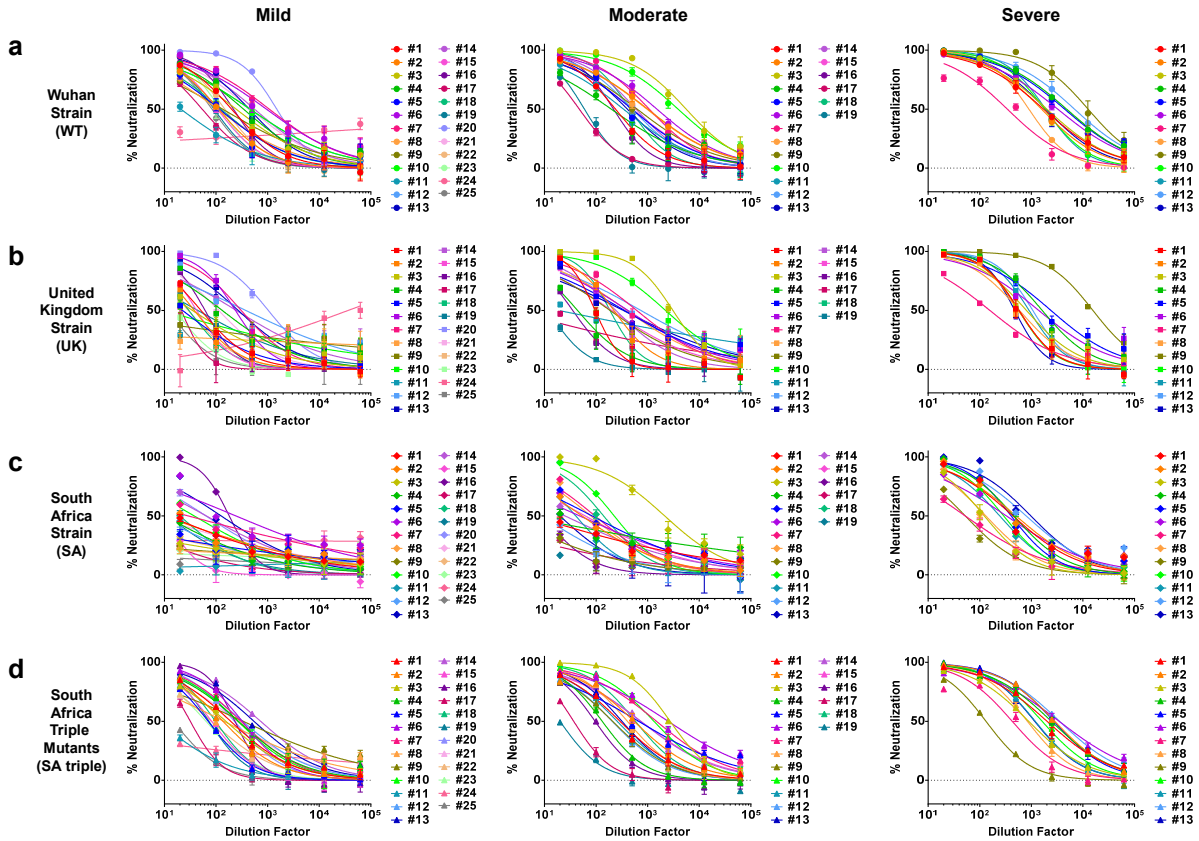

**Supplementary Figure 1: Pseudovirus neutralization curves by 57 COVID-19 convalescent plasma samples.** Plasma samples of Mild ( $n=25$ ), Moderate ( $n=19$ ), and Severe ( $n=13$ ) COVID-19 patients at median 31 days post-illness onset (pio) were incubated with pseudovirus expressing SARS-CoV-2 spike (S) glycoprotein 1 hour prior to infection of CHO-ACE2 cells for 48 hours. Infection levels were determined by luciferase assay, and percentage of neutralization is presented. Dose-response titration curves against (a) wildtype Wuhan strain (WT, circles), (b) UK strain (B.1.1.7, squares), (c) SA strain (B.1.351, diamonds) and (d) SA triple mutant (K417N/E484K/N501Y, triangles) at 1:20 to 1:62500 dilutions. Lines represent non-linear regression fit and data are shown as mean  $\pm$  SD of two to four independent experiments.

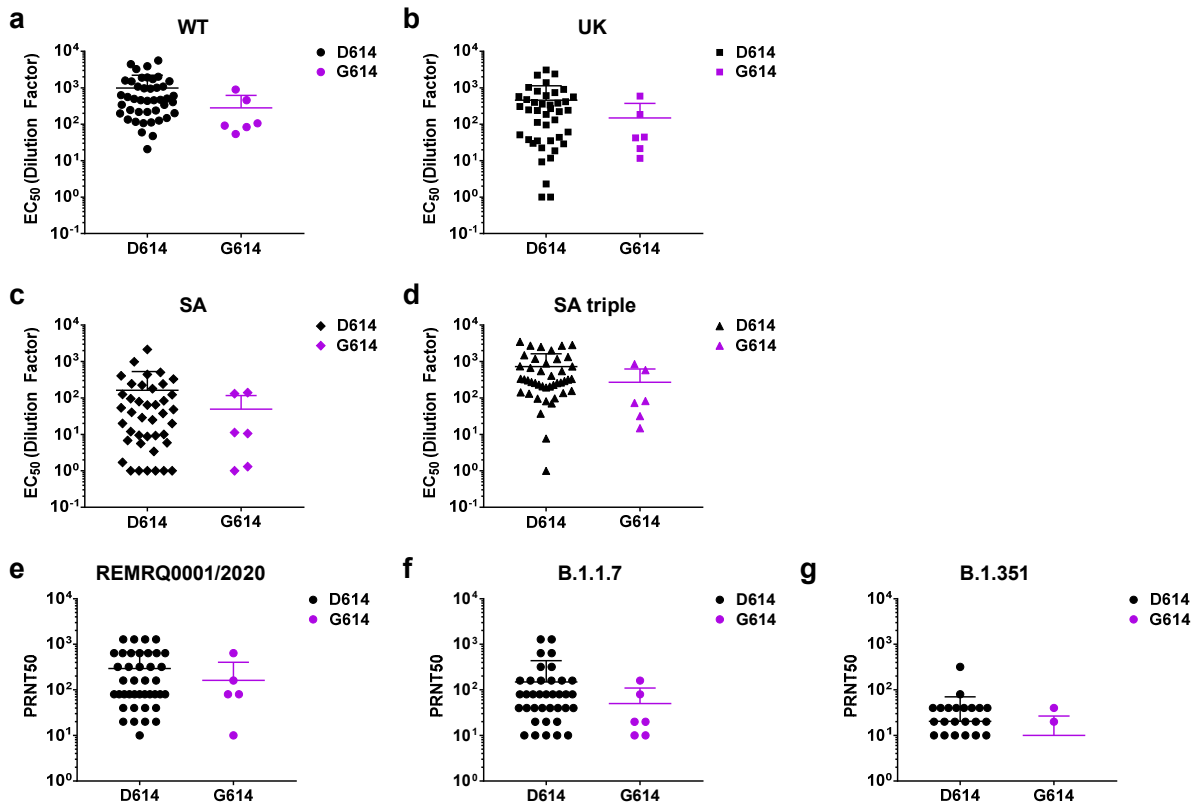

**Supplementary Figure 2: Effect of initial infection status on antibody neutralization against different pseudovirus strains.** Dot plots of  $EC_{50}$  values of neutralization against (a) WT (circles), (b) UK (squares), (c) SA (diamonds) and (d) SA triple (triangles) pseudoviruses from COVID-19 patients presented in two different groups of initial infection status of D614 strain (n=44, black), and G614 strain (n=6, purple). Dot plots of PRNT50 values of live virus neutralization against (e) RMERQ0001/2020, (f) B.1.1.7 isolate, and (g) B.1.351 isolate from COVID-19 patients presented in two different groups of initial infection status of D614 strain (n=44, black), and G614 strain (n=6, purple). Since results are plotted on a logarithmic scale and plasma samples that did not neutralize the live virus with assigned PRNT50 values at “0” are not plotted in (e-g). Statistical analysis was carried out to compare D614 and G614 groups of patients using Kruskal-Wallis tests followed by post hoc Dunn’s multiple comparisons tests and there is no significant difference between D614 and G614 group of patients against all different pseudovirus or live virus strains.

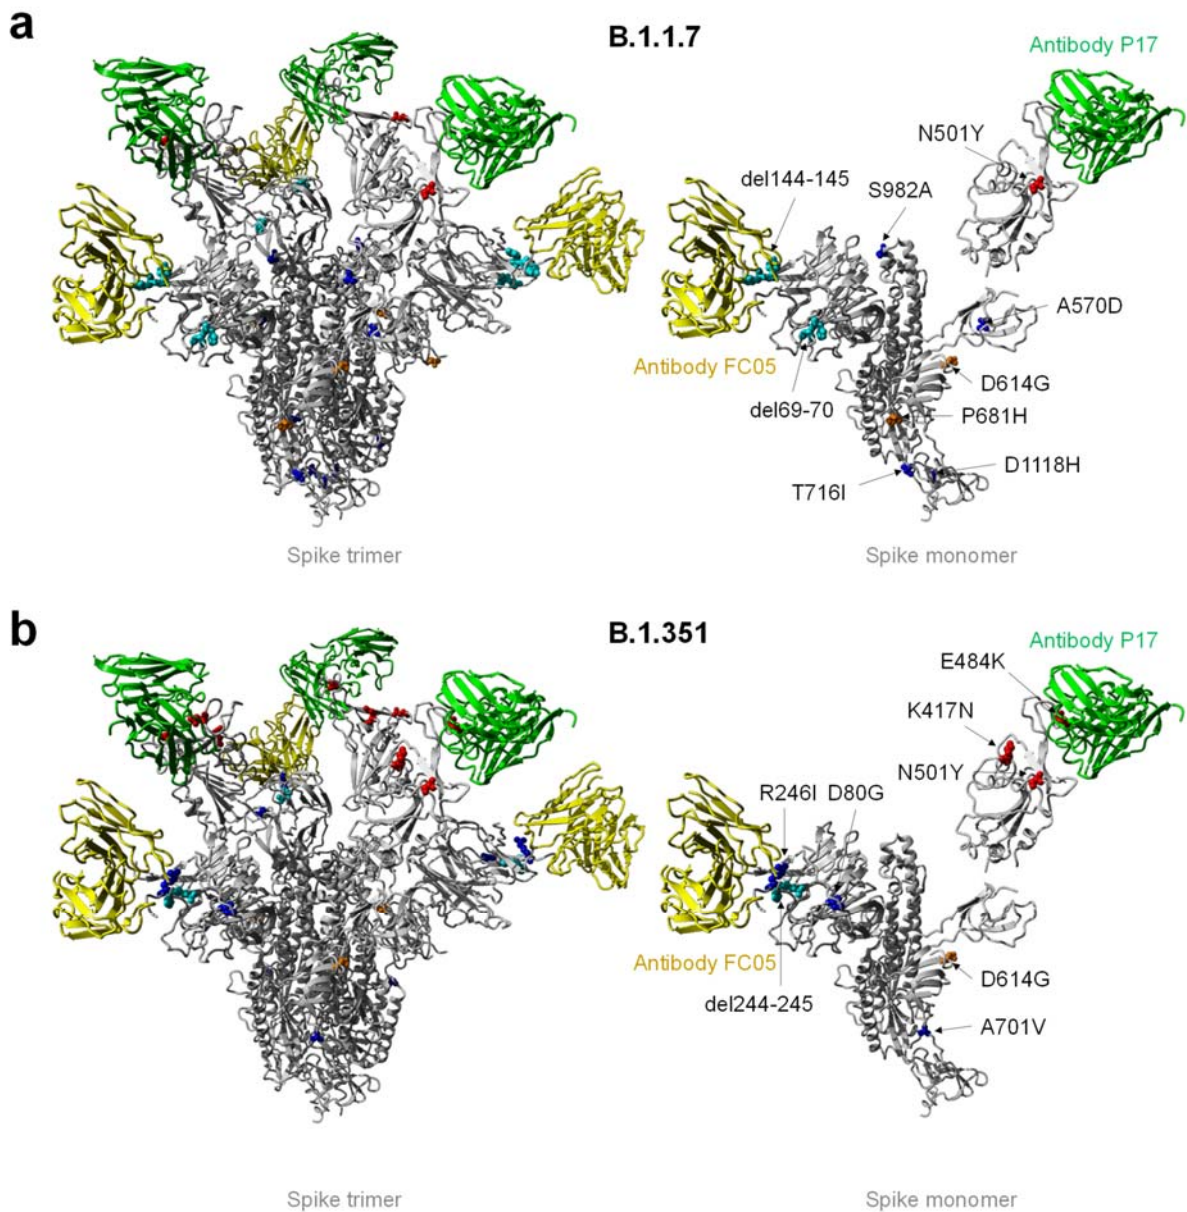

**Supplementary Figure 3: Spike glycoprotein from PDB:7CWU in complex with 2 antibodies.** Spike glycoprotein in gray, 2 antibodies in green (P17) and yellow (FC05), and amino acid changes corresponding to B.1.1.7 (**a**) or B.1.351 (**b**) are highlighted in colored balls with position labels. Left panel: spike trimer, right panel: spike monomer. Visualization with Yasara.

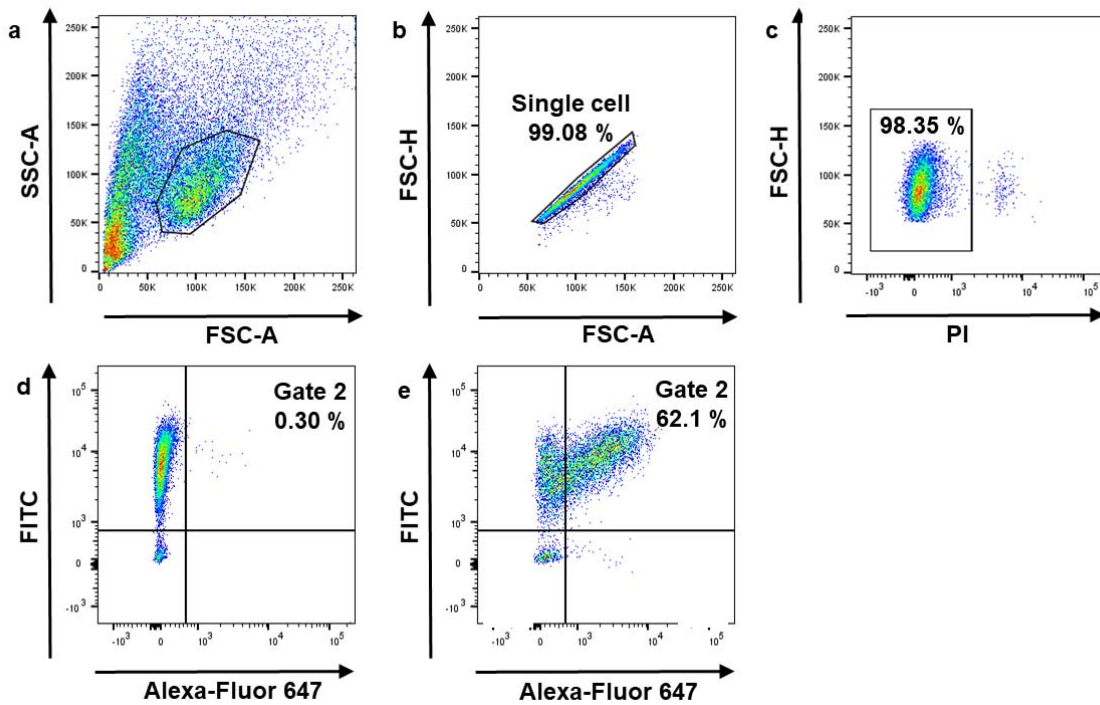

**Supplementary Figure 4: FACS plot analysis.** Cells were gated on: (a) FSC-A/SSC-A to exclude cell debris, (b) FSC-A/FSC-H to select for single cells, (c) FSC-A/PI to select for live cells (PI-negative population), (d, e) FITC/Alexa Fluor 647. Binding is determined by the percentage of GFP-positive S protein-expressing cells that are bound by specific antibody, indicated by the events that are Alexa Fluor 647- and FITC-positive (Gate 2). (d) healthy control plasma, 1:100 diluted; (e) COVID-19 patient plasma, 1:100 diluted.

## SUPPLEMENTARY TABLES

**Supplementary Table 1: Pseudovirus neutralization EC<sub>50</sub> values of for 57 COVID-19 convalescent plasma samples.**

| Patient        | WT      | UK      | SA     | SA triple |
|----------------|---------|---------|--------|-----------|
| Mild (#1)      | 200.6   | 51.1    | 11.9   | 193.1     |
| Mild (#2)      | 112.0   | 37.9    | 9.5    | 136.4     |
| Mild (#3)      | 245.7   | 35.0    | 1.0*   | 155.9     |
| Mild (#4)      | 342.1   | 132.1   | 10.0   | 273.0     |
| Mild (#5)      | 116.5   | 22.5    | 1.0*   | 70.6      |
| Mild (#6)      | 948.5   | 237.7   | 241.8  | 323.7     |
| Mild (#7)      | 1077.0  | 306.9   | 28.8   | 304.5     |
| Mild (#8)      | 106.7   | 1.0*    | 1.0*   | 142.7     |
| Mild (#9)      | 134.7   | 1.0*    | 1.0*   | 337.6     |
| Mild (#10)     | 458.8   | 9.3     | 37.6   | 266.2     |
| Mild (#11)     | 20.8    | N.D.    | N.D.   | 7.7       |
| Mild (#12)     | 454.5   | 377.8   | 6.8    | 331.3     |
| Mild (#13)     | 439.3   | 269.0   | 125.3  | 544.6     |
| Mild (#14)     | 558.7   | 247.8   | 64.7   | 734.6     |
| Mild (#15)     | 106.3   | 42.1    | 10.6   | 82.3      |
| Mild (#16)     | 217.5   | 61.2    | 179.9  | 233.1     |
| Mild (#17)     | 53.9    | 21.4    | 1.3    | 31.8      |
| Mild (#18)     | 125.5   | 29.8    | 20.0   | 97.7      |
| Mild (#19)     | 91.6    | 44.4    | 11.2   | 73.0      |
| Mild (#20)     | 1504.0  | 1032.0  | 63.8   | 228.2     |
| Mild (#21)     | 468.7   | 112.2   | 5.9    | 256.4     |
| Mild (#22)     | 148.2   | 29.0    | 1.0*   | 81.3      |
| Mild (#23)     | 122.6   | 16.3    | 1.0*   | 64.0      |
| Mild (#24)     | N.D.    | N.D.    | 1.0*   | 1.0*      |
| Mild (#25)     | 83.7    | 11.6    | 1.0*   | 14.8      |
| Moderate (#1)  | 238.4   | 95.7    | 5.6    | 291.9     |
| Moderate (#2)  | 1007.0  | 221.8   | 53.4   | 545.8     |
| Moderate (#3)  | 5586.0  | 3086.0  | 2136.0 | 2732.0    |
| Moderate (#4)  | 197.7   | 43.8    | 3.4    | 131.8     |
| Moderate (#5)  | 495.7   | 356.4   | 83.5   | 670.4     |
| Moderate (#6)  | 1514.0  | 414.6   | 48.1   | 2509.0    |
| Moderate (#7)  | 1076.0  | 614.3   | 95.3   | 1485.0    |
| Moderate (#8)  | 970.5   | 396.7   | 79.2   | 405.4     |
| Moderate (#9)  | 628.1   | 186.7   | 1.7    | 209.6     |
| Moderate (#10) | 3895.0  | 2220.0  | 224.6  | 1327.0    |
| Moderate (#11) | 340.2   | 18.7    | 40.3   | 257.0     |
| Moderate (#12) | 508.1   | 737.9   | 8.8    | 205.6     |
| Moderate (#13) | 405.1   | 338.2   | 19.9   | 318.2     |
| Moderate (#14) | 599.1   | 241.9   | 25.0   | 739.0     |
| Moderate (#15) | 510.4   | 200.8   | 61.5   | 736.1     |
| Moderate (#16) | 217.9   | 35.3    | 9.3    | 95.9      |
| Moderate (#17) | 47.4    | 2.3     | 1.0*   | 36.9      |
| Moderate (#18) | 458.2   | 186.0   | 139.8  | 580.2     |
| Moderate (#19) | 59.5    | 11.8    | N.D.   | 20.0      |
| Severe (#1)    | 1737.0  | 579.7   | 441.3  | 2021.0    |
| Severe (#2)    | 1582.0  | 564.6   | 504.5  | 2850.0    |
| Severe (#3)    | 2006.0  | 804.4   | 122.6  | 888.9     |
| Severe (#4)    | 4839.0  | 1626.0  | 459.4  | 2449.0    |
| Severe (#5)    | 4439.0  | 2401.0  | 406.0  | 2730.0    |
| Severe (#6)    | 3257.0  | 1393.0  | 328.6  | 3471.0    |
| Severe (#7)    | 343.2   | 157.3   | 52.2   | 427.1     |
| Severe (#8)    | 897.9   | 590.1   | 131.3  | 840.0     |
| Severe (#9)    | 12614.0 | 15629.0 | 52.4   | 132.3     |
| Severe (#10)   | 1822.0  | 568.2   | 291.1  | 1623.0    |
| Severe (#11)   | 1896.0  | 905.1   | 244.0  | 1194.0    |
| Severe (#12)   | 6882.0  | 1067.0  | 793.5  | 3539.0    |
| Severe (#13)   | 1918.0  | 477.4   | 978.9  | 1166.0    |

\* Use 1.0 if calculated EC<sub>50</sub> < 1; N.D., not determined.

**Supplementary Table 2: Live virus neutralization PRNT50 values of for 57 COVID-19 convalescent plasma samples.**

| <b>Patient</b> | <b>REMRQ0001/2020</b> | <b>B.1.1.7</b> | <b>B.1.351</b> |
|----------------|-----------------------|----------------|----------------|
| Mild (#1)      | 160                   | 160            | 0              |
| Mild (#2)      | 20                    | 160            | 10             |
| Mild (#3)      | 80                    | 20             | 0              |
| Mild (#4)      | 20                    | 10             | 20             |
| Mild (#5)      | 0                     | 0              | 0              |
| Mild (#6)      | 80                    | 80             | 40             |
| Mild (#7)      | 40                    | 160            | 10             |
| Mild (#8)      | 0                     | 0              | 0              |
| Mild (#9)      | 80                    | 0              | 0              |
| Mild (#10)     | 640                   | 40             | 0              |
| Mild (#11)     | 0                     | 0              | 0              |
| Mild (#12)     | 80                    | 10             | 0              |
| Mild (#13)     | 320                   | 40             | 20             |
| Mild (#14)     | 80                    | 40             | 10             |
| Mild (#15)     | 80                    | 10             | 0              |
| Mild (#16)     | 80                    | 160            | 20             |
| Mild (#17)     | 10                    | 10             | 0              |
| Mild (#18)     | 160                   | 10             | 0              |
| Mild (#19)     | 160                   | 20             | 0              |
| Mild (#20)     | 640                   | 640            | 0              |
| Mild (#21)     | 40                    | 80             | 0              |
| Mild (#22)     | 20                    | 80             | 0              |
| Mild (#23)     | 20                    | 20             | 0              |
| Mild (#24)     | 0                     | 0              | 0              |
| Mild (#25)     | 0                     | 20             | 0              |
| Moderate (#1)  | 80                    | 160            | 0              |
| Moderate (#2)  | 160                   | 80             | 20             |
| Moderate (#3)  | 640                   | 1280           | 320            |
| Moderate (#4)  | 40                    | 40             | 0              |
| Moderate (#5)  | 80                    | 40             | 10             |
| Moderate (#6)  | 40                    | 40             | 0              |
| Moderate (#7)  | 80                    | 80             | 20             |
| Moderate (#8)  | 1280                  | 0              | 20             |
| Moderate (#9)  | 640                   | 80             | 0              |
| Moderate (#10) | 1280                  | 80             | 40             |
| Moderate (#11) | 80                    | 10             | 0              |
| Moderate (#12) | 320                   | 20             | 0              |
| Moderate (#13) | 80                    | 20             | 10             |
| Moderate (#14) | 320                   | 40             | 40             |
| Moderate (#15) | 80                    | 20             | 80             |
| Moderate (#16) | 640                   | 40             | 0              |
| Moderate (#17) | 20                    | 0              | 0              |
| Moderate (#18) | 80                    | 80             | 40             |
| Moderate (#19) | 10                    | 10             | 0              |
| Severe (#1)    | 1280                  | 1280           | 40             |
| Severe (#2)    | 640                   | 640            | 40             |
| Severe (#3)    | 160                   | 320            | 10             |
| Severe (#4)    | 320                   | 320            | 80             |
| Severe (#5)    | 1280                  | 80             | 40             |
| Severe (#6)    | 640                   | 320            | 40             |
| Severe (#7)    | 320                   | 40             | 0              |
| Severe (#8)    | 640                   | 160            | 20             |
| Severe (#9)    | 5120                  | 5120           | 0              |
| Severe (#10)   | 320                   | 320            | 40             |
| Severe (#11)   | 320                   | 80             | 40             |
| Severe (#12)   | 640                   | 320            | 160            |
| Severe (#13)   | 320                   | 160            | 80             |

Use value "0" if the plasma samples failed to neutralize 50% of live virus at the lowest plasma dilution.

**Supplementary Table 3: Primers used in this study.**

| <b>Primer Name</b> | <b>Primer Sequences</b>                     |
|--------------------|---------------------------------------------|
| FL1-del69-70-F     | GACATGGTTTCACGCGATCTCAGGCACTAACGGGACGA      |
| FL1-del144-145-F   | CGACCCGTTTCTGGGCGTGCATAAGAATAATAAGTCAT      |
| FL1-K417N-F        | CGGACAGACCGGGAAcATCGCCGACTACAAC             |
| FL1-E484K-F        | CTACCCCATGCAACGGAGTgAaAAGGGTTCAACTGCTATTTTC |
| FL1-N501Y-F        | CTACGGGTTTCAGCCAACCIACGGCGTCCGATATCAGCC     |
| FL1-D614G-F        | AAGTAGCCGCTTTGTACCAAGgCGTCAATTGTACCGAGGTGCC |
| FL1-A570D-F        | TTCGGTCGCGATATCGaCGATACAACAGACGCCGTTTC      |
| FL1-P681H-F        | CAAACCCAAACAAACTCACaCAGGCCGGGCTAGGTCTGTT    |
| FL1-T716I-F        | ACAATTCCATAGCTATTCCTAtCAACTTCACAATCTCCGTAAC |
| FL1-S982A-F        | GCGTGTTGAACGACATATTGgcCAGGCTCGATAAGGTAGAAG  |
| FL1-D1118H-F       | AGCCCCAGATTATCACCACTcATAATACCTTCGTCAGCGGA   |
| FL1-D80A-F         | GGACGAAACGATTCCGcCAATCCGGTGCTCCC            |
| FL1-R246I-F        | CACTGTTGGCCCTGCACatcTCTTATCTCACCCCGGG       |
| FL1-A701V-F        | CCATGTCCCTGGGCGtTGAGAACAGTGTGGC             |
| FL1-del242-245-F   | GGTTCCAGACACTGatcTCTTATCTCACCCC             |
| XbaSPFor           | GCTCTAGAGCCACCATGTTTCGTCTTCCTGGTGC          |
| BamSPRev           | CGGGATCCttaACAACAAGAGCCGCAGG                |
| SPF1               | ATGTTTCGTCTTCCTGGTG                         |
| SPF2               | CCTGTGTTTCACAAACGTGT                        |
| SPF3               | GATACAACAGACGCCGTTTC                        |
| SPF4               | CAGGCCTTGAATACCCTCG                         |
| IREsrev            | CATATAGACAAACGCACACC                        |
